# Supplementary material for: Activity and biophysical inhibition resistance of a novel synthetic lung surfactant containing Super-Mini-B DATK peptide
Source: PeerJ. 2016 Jan 5;4:e1528. doi: 10.7717/peerj.1528 (PMC4715451; doi:10.7717/peerj.1528)
Supplement: Data S1 [file peerj-04-1528-s001.xlsx]

## Sheet: Sheet 1
Figure 3A
	P Value
Samples	1	2	5	10	15	20
SSM vs.
0.4	< 0.05
0.5	< 0.02	< 0.05
0.67	< 0.001	< 0.005	< 0.05	< 0.05	< 0.05
0.75	< 0.001	< 0.001	< 0.005	< 0.005	< 0.05	< 0.05
0.83	< 0.001	< 0.001	< 0.001	< 0.005	< 0.05	< 0.05
2x SSM vs 83%	< 0.001	< 0.001	< 0.001	< 0.005	< 0.001	< 0.001
Figure 3B
	P Value
Samples	0.25	0.5	1	2	5	10	15	20
SSM vs
0.4		< 0.05
0.5	< 0.05	< 0.05
0.67	< 0.01	< 0.01	< 0.01	< 0.01	< 0.01	< 0.05	< 0.05	< 0.05
0.75	< 0.001	< 0.05	< 0.001	< 0.001	< 0.001	< 0.05	< 0.01	< 0.05
0.83	< 0.001	< 0.001	< 0.001	< 0.001	< 0.005	< 0.05	< 0.01	< 0.05
2x SSM vs. 83%	< 0.05	< 0.05	< 0.05	< 0.05	< 0.05	< 0.05	< 0.001	< 0.005
Figure 4A
	P Value
Samples	1	2	5	10	15	20
SSM vs.
0.14		< 0.05
0.2	< 0.05	< 0.01	< 0.05	< 0.05	< 0.05
0.33	< 0.001	< 0.001	< 0.001	< 0.05	< 0.05	< 0.05
0.4	< 0.001	< 0.001	< 0.001	<0.01	< 0.05	< 0.05
2x vs. 40%	< 0.05	< 0.05	< 0.01	< 0.01	< 0.01	< 0.05
Figure 4B
Sample	0.25	0.5	1	2	5	10	15	20
SSM vs.
0.14
0.2				< 0.05	< 0.05		< 0.05	< 0.05
0.33				< 0.05	< 0.01		< 0.05	< 0.01
0.4				< 0.05	< 0.01	< 0.05	< 0.01	< 0.01
2x Vs. 40%					< 0.05	< 0.01	< 0.01	< 0.01
Figure 5A
	P Value
Samples	1	2	5	10	15	20
SSM vs.
0.1	< 0.05	< 0.05	< 0.05
0.15	< 0.05	< 0.05	< 0.05	< 0.05
0.2	< 0.001	< 0.001	< 0.001	< 0.001	< 0.05	< 0.05
0.3	< 0.001	< 0.001	< 0.001	< 0.001	< 0.001	< 0.005
0.35	< 0.001	< 0.001	< 0.001	< 0.001	< 0.001	< 0.005
2x vs. 35%		< 0.05	< 0.05	< 0.05	< 0.01	< 0.01
Figure 5B
	P Value
Samples	0.25	0.5	1	2	5	10	15	20
SSM vs.
0.1
0.15							< 0.05
0.2				< 0.05	< 0.05	< 0.05	< 0.05	< 0.05
0.3				< 0.05	< 0.001	< 0.001	< 0.001	< 0.01
0.35				< 0.05	< 0.001	< 0.001	< 0.001	< 0.001
2x vs. 35%					< 0.05	< 0.05	< 0.005	< 0.005
Figure 6A
	P Value
Samples	1	2	5	10	15	20
SSM vs.
0.1	< 0.05	< 0.05
0.15	< 0.05	< 0.05	< 0.05
0.2	< 0.01	< 0.01	< 0.01	< 0.05	< 0.05	< 0.05
0.3	< 0.01	< 0.01	< 0.01	< 0.01	< 0.05	< 0.05
0.35	< 0.01	< 0.01	< 0.01	< 0.01	< 0.01	< 0.005
2x vs. 35%	< 0.05	< 0.05	< 0.01	< 0.005	< 0.005	< 0.005
Figure 6B
	P Value
Samples	0.25	0.5	1	2	5	10	15	20
SSM vs.
0.1
0.15							< 0.05
0.2				< 0.05	< 0.05	< 0.05	< 0.05	< 0.05
0.3				< 0.05	< 0.05	< 0.01	< 0.01	< 0.01
0.35				< 0.05	< 0.05	< 0.01	< 0.01	< 0.01
2x vs. 35%					< 0.05	< 0.05	< 0.01	< 0.01
Figure 7
Rabbit#	Surfactant	Survived	Weight	Rx/Lavage	Lav in	Lav out	%	Surf dose		PaO2	PaO2	PaO2	PaO2	PaO2	PaO2	PaO2	PaO2	PaO2		Cdyn	Cdyn	Cdyn	Cdyn	Cdyn	Cdyn	Cdyn	Cdyn	Cdyn
	type	exp	kg	protocol	ml	ml	recovery	ml		0 min	15 min	30 min	45 min	60 min	75 min	90 min	105 min	120 min		0 min	15 min	30 min	45 min	60 min	75 min	90 min	105 min	120 min
SMB-DATK										mmHg	mmHg	mmHg	mmHg	mmHg	mmHg	mmHg	mmHg	mmHg		mL/kg/cmH2O	mL/kg/cmH2O	mL/kg/cmH2O	mL/kg/cmH2O	mL/kg/cmH2O	mL/kg/cmH2O	mL/kg/cmH2O	mL/kg/cmH2O	mL/kg/cmH2O
1	SMB-DATK	yes	1.4	7x15 +1x10 ml	115	97.5	0.847826	4		54	412	466	477	485	511	517	539	548		0.341814	0.43494	0.45827	0.460718	0.492464	0.541502	0.54115	0.534352	0.536995
2	SMB-DATK	yes	1.2	3x30 ml	90	75	0.833333	3.4		34	341	368	386	441	490	479	484	486		0.357678	0.414357	0.430916	0.453983	0.473838	0.47041	0.513646	0.509599	0.483929
3	SMB-DATK	yes	1.3	3x30 ml	90	75.5	0.838889	3.7		38	375	434	486	494	497	499	506	529		0.270059	0.382425	0.422975	0.434225	0.438549	0.479241	0.525631	0.524497	0.521138
4	SMB-DATK	yes	1.2	2x30 ml	60	50.5	0.841667	3.4		65	353	402	389	425	502	496	494	512		0.290492	0.389085	0.396645	0.43699	0.461024	0.495238	0.492416	0.498068	0.500205
5	SMB-DATK	yes	1.2	2x30 ml	60	53.5	0.891667	3.4		51	297	356	461	442	449	449	439	447		0.301053	0.367494	0.386033	0.407449	0.446831	0.461967	0.465525	0.471158	0.462758
Average										48.4	355.6	405.2	439.8	457.4	489.8	488	492.4	504.4		0.312219	0.39766	0.418968	0.438673	0.462541	0.489672	0.507674	0.507535	0.501005
SD										12.5419	42.4594	45.664	48.587	30.2374	24.0562	25.632	36.3359	39.3611		0.0364574	0.0268525	0.0286639	0.020724	0.0214926	0.031483	0.0295305	0.0246173	0.0293924
SEM										5.60909	18.989	20.4222	21.7294	13.523	10.7586	11.4633	16.2504	17.6034		0.0163047	0.0120092	0.0128193	0.00926832	0.00961206	0.01408	0.0132068	0.0110095	0.0131451
LIPIDS
6	Lipids	yes	1.4	7x30 ml	210	190.5	0.907143	4		39	90	91	109	129	124	106	104	107		0.278413	0.285995	0.282353	0.285407	0.282188	0.280948	0.281117	0.280454	0.285862
7	Lipids	no	1.2	6x30 ml	180	167.5	0.930556	3.43		64	113	98	72	57
8	Lipids	yes	1.2	3x30 ml	90	84	0.933333	3.4		43	63	77	85	119	108	92	84	78		0.323652	0.327511	0.321286	0.329229	0.325545	0.335635	0.330095	0.292358	0.290523
9	Lipids	no	1.2	2x30 ml	60	46	0.766667	3.4		54	55	54
10	Lipids	yes	1.4	2x30 ml	60	52.5	0.875	4		44	89	82	81	111	75	68	61	65		0.323764	0.311901	0.309533	0.312199	0.311882	0.319699	0.322583	0.327529	0.309621
Average										48.8	82	80.4	86.75	104	102.333	88.6667	83	83.3333		0.308609	0.308469	0.304391	0.308945	0.306538	0.312094	0.311265	0.300113	0.295335
SD										10.1341	23.2594	16.8315	15.7982	32.187	24.9867	19.218	21.5174	21.5019		0.0261512	0.0209697	0.0199693	0.0220911	0.0221671	0.0281256	0.026378	0.0244769	0.0125894
SEM										4.53225	10.4022	7.52751	7.8991	16.0935	14.4265	11.0959	12.4235	12.4145		0.0150988	0.0121072	0.0115296	0.0127547	0.0127985	0.0162388	0.0152298	0.0141321	0.0072687
